# Supplementary material
Source: publisher figshare collection journal article supplement (https://adisjournals.figshare.com/articles/dataset/_/21758051)
Supplement: Supplementary file 1 [file 2]

## Recommended Proactive Dose Reductions of Concomitant ASMs to Help Manage Expected Adverse Effects When Adding Cenobamate

### Cenobamate Titration (mg/d)

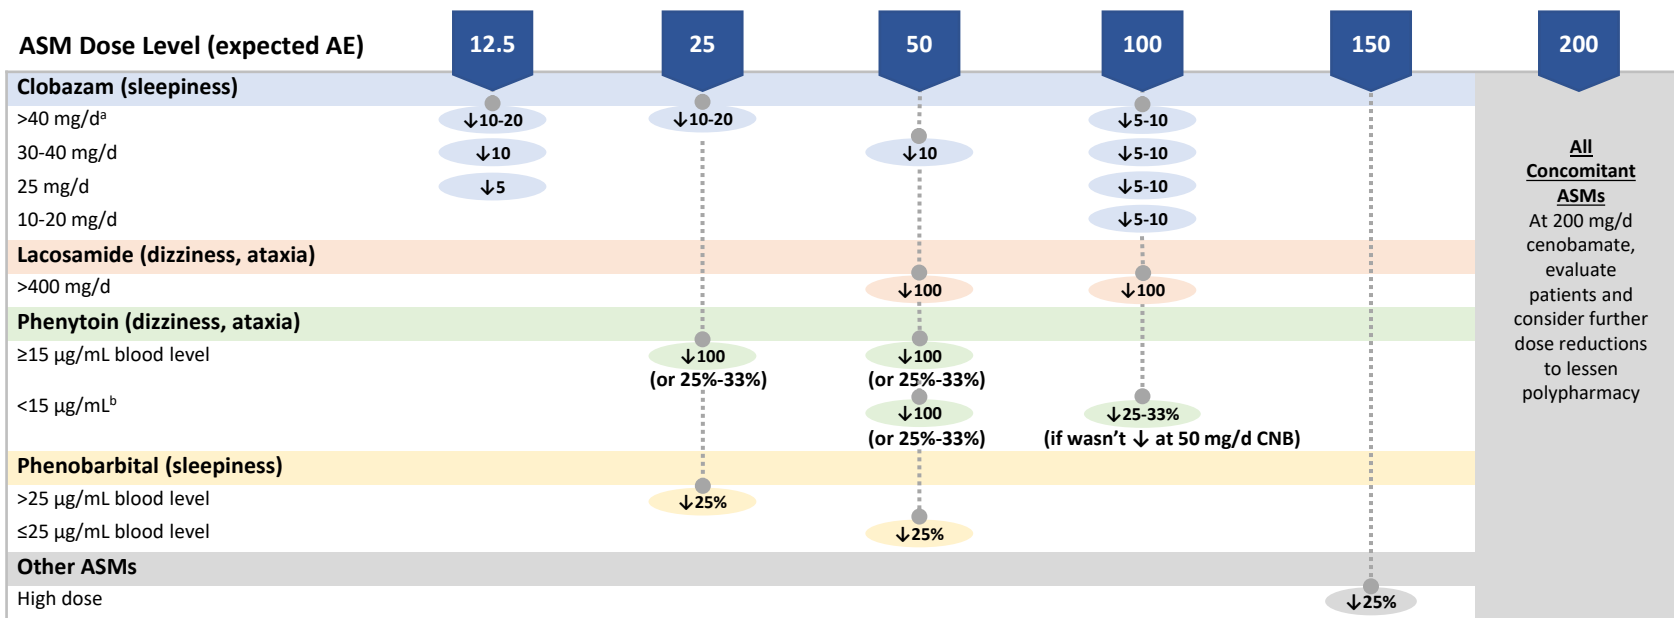

All dosages are in mg/day. Specific drugs shown are those with expected pharmacokinetic (CYP2C19: clobazam, phenytoin, phenobarbital) and pharmacodynamic (lacosamide) interactions. <sup>a</sup>Patients on clobazam >40 mg/d may require more frequent and aggressive dose reductions. <sup>b</sup>Dose reduction of phenytoin at blood levels <15 µg/mL can be made reactively. AE, adverse event; ASMs, antiseizure medications; CNB, cenobamate.

**Reactive dose reductions: if adverse effects occur, reduce doses of concomitant ASMs by ~25% every 2 weeks as needed.**
